# Supplementary material for: Cultura y Unión Europea
Source: Springer Nature journal article supplement (doi:10.1186/s12967-016-1100-9), 1993-01-01

Additional file 4: Figure S3

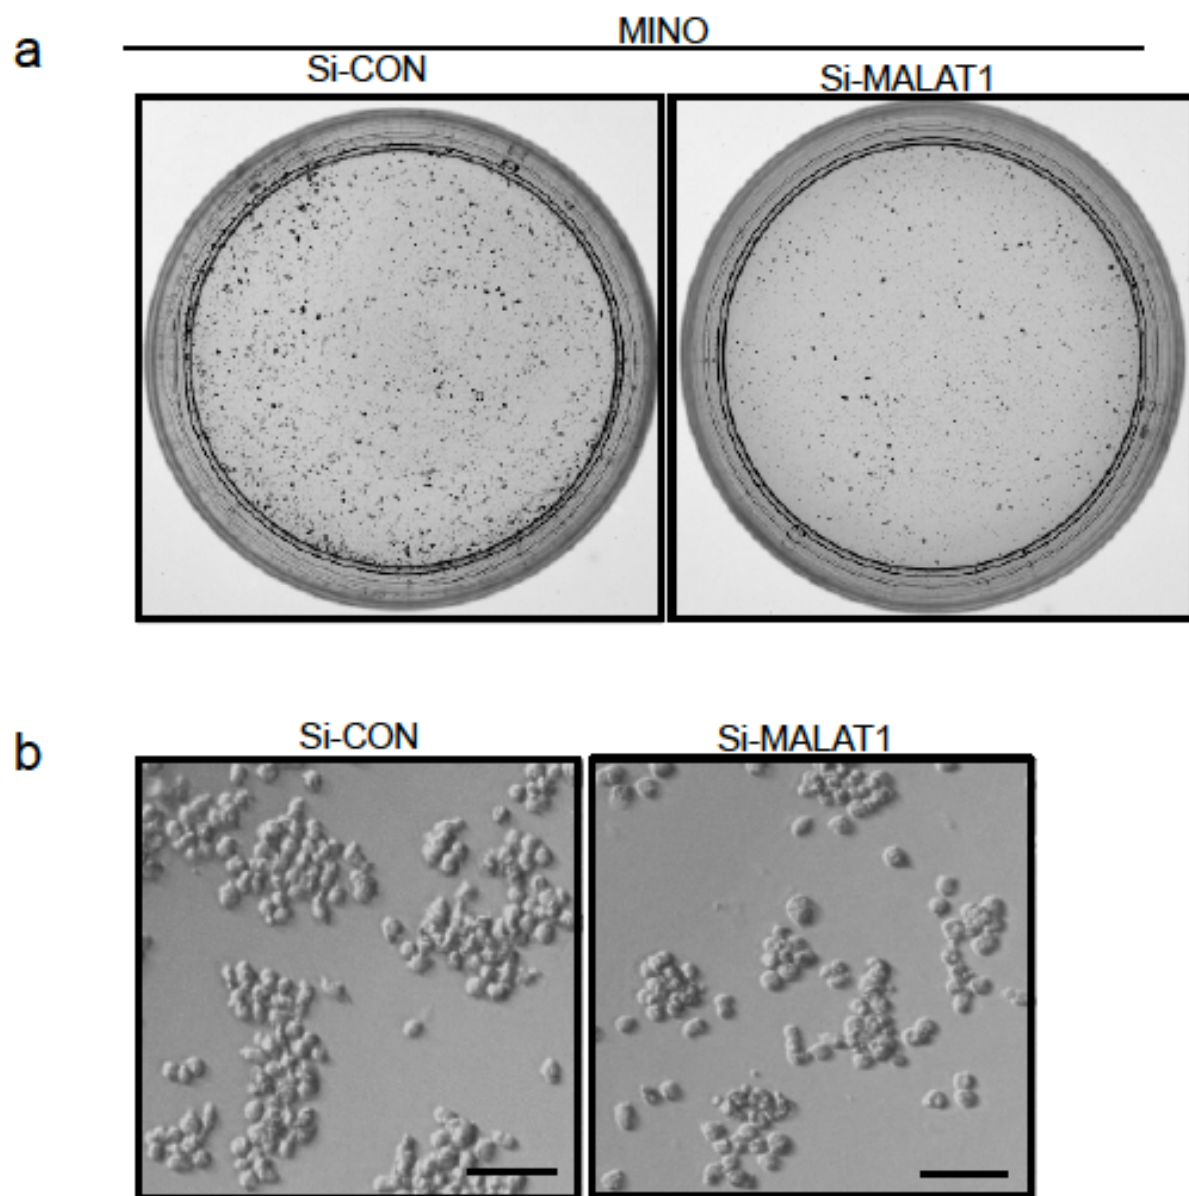

Supplement: MOESM4 [file 11945372]
